# Supplementary material for: Detection of Glyphosate in Drinking Water: A Fast and Direct Detection Method without Sample Pretreatment
Source: PubMed Central journal article supplement (PMC6163928; doi:10.3390/s18092961), 2018-09-05
Supplement: sensors-18-02961-s001.pdf [file sensors-18-02961-s001.pdf]

## Supplementary Material

**Table S1.** Analytical values for available ions in the water sample. Data provided by Mineral Water A/S, Denmark.

| Parameter    | Value | Units |
|--------------|-------|-------|
| Calcium      | <40   | mg/L  |
| Magnesium    | <15   | mg/L  |
| Sodium       | <12   | mg/L  |
| Bicarbonates | <150  | mg/L  |
| Sulfate      | <5    | mg/L  |
| Nitrate      | <1    | mg/L  |
| Potassium    | <5    | mg/L  |
| Chloride     | <13   | mg/L  |
| pH           | 7-7.6 | -     |

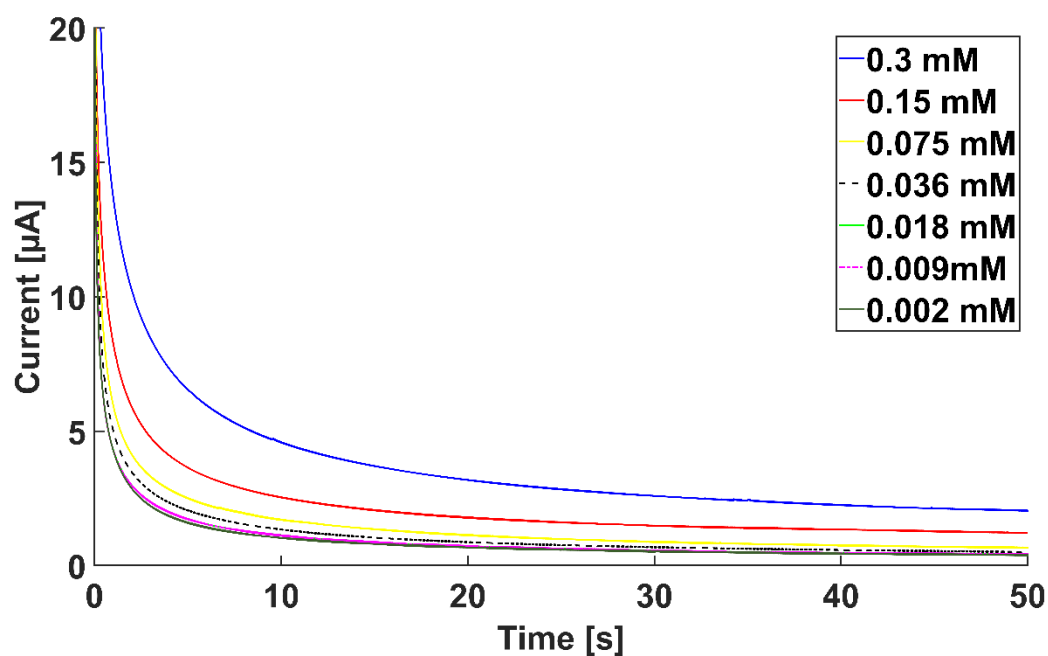

**Figure S1.** Amperometric measurements using the optimized potential of 0.78 V on different concentrations of glyphosate using a gold working electrode.
